# Supplementary material
Source: publisher figshare collection journal article supplement (https://acs.figshare.com/ndownloader/files/4021819)
Supplement: Supplementary file 1 [file 4021819]

# Binding Affinities and Thermodynamics of Noncovalent Functionalization of Carbon Nanotubes with Surfactants

Hyunkyu Oh, Jinsook Sim, and Sang-Yong Ju\*

Department of Chemistry, Yonsei University, Seoul 120-749, Korea

\* Correspondence E-mail: [syju@yonsei.ac.kr](mailto:syju@yonsei.ac.kr)

|                                                                                                                                                                                                                            |         |
|----------------------------------------------------------------------------------------------------------------------------------------------------------------------------------------------------------------------------|---------|
| <b>Table of Contents</b> .....                                                                                                                                                                                             | S1      |
| Derivation of Hill equation using equilibrium constant .....                                                                                                                                                               | S2      |
| FMN interaction with other surfactants .....                                                                                                                                                                               | S3      |
| <b>Figure S1.</b> Absorption spectra of FMN without SWNTs before and after probe-sonication .....                                                                                                                          | S4      |
| <b>Figure S2.</b> Representative atomic force microscopy (AFM) phase image and the corresponding length and height histograms of dispersed nanotubes .....                                                                 | S4      |
| <b>Figure S3.</b> Absorption spectra of FMN-wrapped SWNTs titrated with surfactants .....                                                                                                                                  | S5      |
| <b>Figure S4.</b> PLE maps of the initial FMN-wrapped SWNTs and the corresponding surfactant-replaced nanotube dispersions .....                                                                                           | S6      |
| <b>Figure S5.</b> Absorption spectra of FMN titrated with surfactant .....                                                                                                                                                 | S7      |
| <b>Figure S6.</b> PLE maps of the initial SC-wrapped SWNTs and the corresponding surfactant-replaced dispersion .....                                                                                                      | S7      |
| <b>Figure S7.</b> Temperature-dependent PL midpoint transition change of 11 other chiral nanotubes .....                                                                                                                   | S8-S10  |
| <b>Figure S8.</b> Full version of thermodynamic function (enthalpy, entropy) calculation using the relation between natural logarithmic equilibrium constant $K$ and $1/T$ .....                                           | S11     |
| <b>Figure S9.</b> Relationship between the equilibrium constant ( $K$ ) and thermodynamic parameters of enthalpy change ( $\Delta H$ ) and entropy change ( $\Delta S$ ) according to the surfactant exchange system ..... | S12     |
| <b>Table S1.</b> Temperature- and chirality-dependent equilibrium constant $K$ and Hill coefficient $\gamma$ .....                                                                                                         | S13-S14 |
| <b>Table S2.</b> Thermodynamic functions (enthalpy, entropy, and Gibbs energy,) derived from van't Hoff equation .....                                                                                                     | S15-S16 |
| Cited references .....                                                                                                                                                                                                     | S16     |

## Derivation of Hill equation using equilibrium constant

The transition during cosurfactant replacement is sigmoidal in nature and can be described by the Hill equation.<sup>S1-3</sup> Since we did not observe any change of FMN absorption during titration (Fig. S5), we assume that FMN and other surfactant is not interacting. Therefore the equilibrium reaction can be considered as

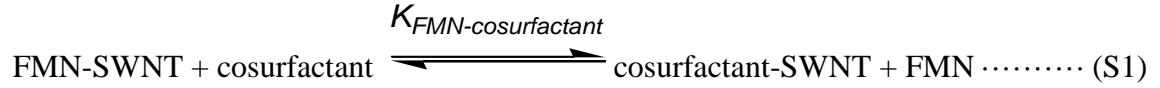

where  $K_{\text{FMN-cosurfactant}}$  is an equilibrium constant of exchange from FMN-SWNT to cosurfactant-SWNT, The equilibrium constant of the above reaction can be rearranged as

$$K_{\text{FMN-cosurfactant}} = \frac{[\text{cosurfactant-SWNT}][\text{FMN}]}{[\text{FMN-SWNT}][\text{cosurfactant}]} \dots\dots\dots (\text{S2})$$

Now, we consider the total binding sites. According to the previous equation<sup>1-3</sup>,

$$\rho = \frac{\text{Binding sites occupied}}{\text{Total binding sites}} = \frac{[\text{cosurfactant-SWNT}]}{[\text{FMN-SWNT}] + [\text{cosurfactant-SWNT}]} \dots\dots\dots (\text{S3})$$

where  $\rho$  is fluorescence intensity of cosurfactant-SWNT.

Rearranging Eqn. (S2) in terms of [cosurfactant-SWNT] and substituting it into Eqn. (S3) gives

$$\begin{aligned} \rho &= \frac{\frac{K_{\text{FMN-cosurfactant}} \cdot [\text{FMN-SWNT}] \cdot [\text{cosurfactant}]}{[\text{FMN}]}}{[\text{FMN-SWNT}] + \left[ \frac{K_{\text{FMN-cosurfactant}} \cdot [\text{FMN-SWNT}] \cdot [\text{cosurfactant}]}{[\text{FMN}]} \right]} \\ &= \frac{K_{\text{FMN-cosurfactant}} \cdot [\text{cosurfactant}]}{[\text{FMN}] + K_{\text{FMN-cosurfactant}} \cdot [\text{cosurfactant}]} \\ &= \frac{\frac{[\text{cosurfactant}]}{\frac{[\text{FMN}]}{K_{\text{FMN-cosurfactant}}} + [\text{cosurfactant}]}}{\dots\dots\dots} \dots\dots\dots (\text{S4}) \end{aligned}$$

Generalizing Eqn. (S1) for equilibrium reaction with reaction coefficients can be written as

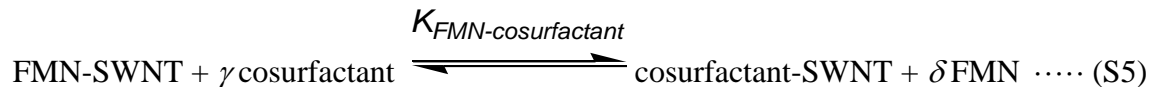

where  $\gamma$  and  $\delta$  are coefficients of surfactants. Likewise Equation S4, one can express  $\rho$  in terms of concentration as follows.

$$\rho = \frac{[\text{cosurfactant}]^\gamma}{\left[\frac{[\text{FMN}]^\delta}{K_{\text{FMN-cosurfactant}}}\right]^\gamma + [\text{cosurfactant}]^\gamma} \dots\dots\dots (\text{S6})$$

By assuming that  $\delta$  simply depends on  $\gamma$ , one can reduce complexity of the above equation as follows.

$$\rho = \frac{[\text{cosurfactant}]^\gamma}{\left[\frac{[\text{FMN}]}{K_{\text{FMN-cosurfactant}}}\right]^\gamma + [\text{cosurfactant}]^\gamma} \dots\dots\dots (\text{S7})$$

here  $[\text{FMN}] / K_{\text{FMN-cosurfactant}}$  is equal to  $[\text{cosurfactant}]^\gamma$  at which half of the SWNTs are bound. For the calculation of equilibrium constant and Hill coefficient, the concentration of FMN was set to 2.09 mM, the initial concentration of FMN-SWNT dispersion.

### **FMN interaction with other surfactants**

In order for the above equilibrium reaction to hold, FMN and other surfactants should have no interaction. For this, we measured absorption spectra of FMN in the absence and presence of SDBS, SC, and SDS. We titrated FMN solution with increasing amount of SDBS, SC, and SDS. The results are shown in Fig. S5, where the initial FMN absorption spectra peaking at 370 and 445 nm was not changed after addition of cosurfactants. Zoom-in spectra in inset showed no change in absorption maximum.

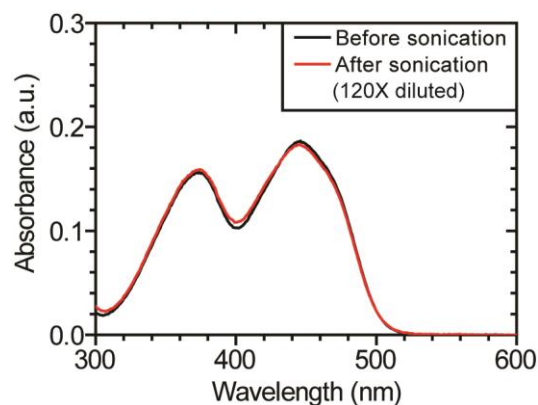

**Figure S1.** Absorption spectra of FMN without SWNTs before and after probe-sonication. The solution was obtained using same amount of FMN in water and was treated with same protocol for FMN-SWNTs. In order to adjust to the absorbance limit (*i.e.* 3), we opt to dilute the sample by 120 times

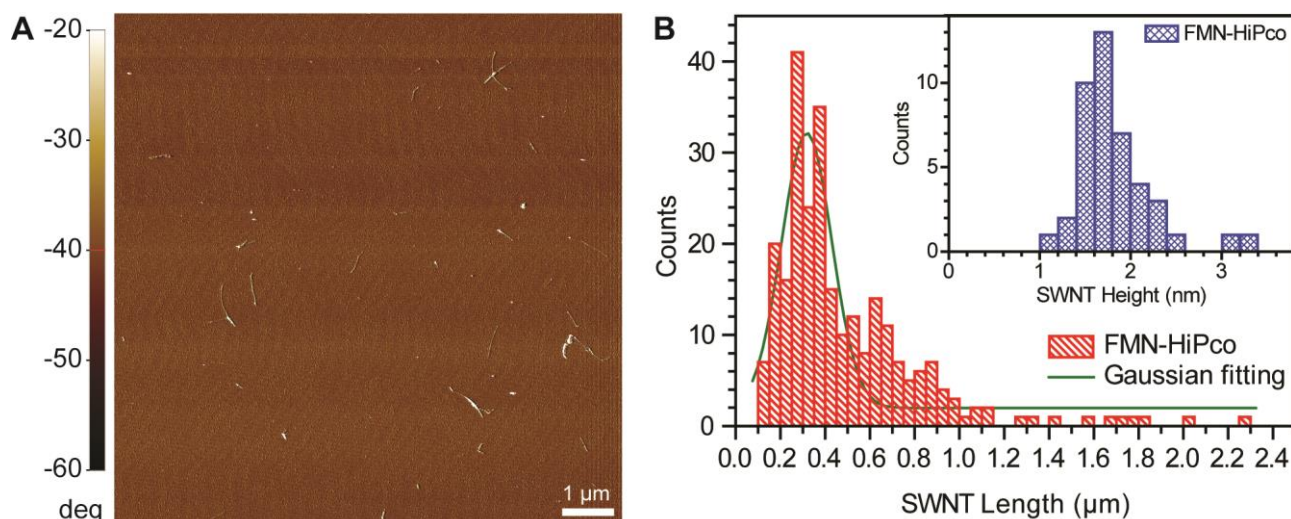

**Figure S2.** Representative atomic force microscopy (AFM) phase image and the corresponding length and height histograms of dispersed nanotubes. Phase images of (A) FMN-wrapped SWNTs and (B) corresponding length histogram. Green curves represent Gaussian fitting of the length distributions of FMN-wrapped SWNTs. Inset of (B) display the height distribution profile of FMN-wrapped SWNTs.

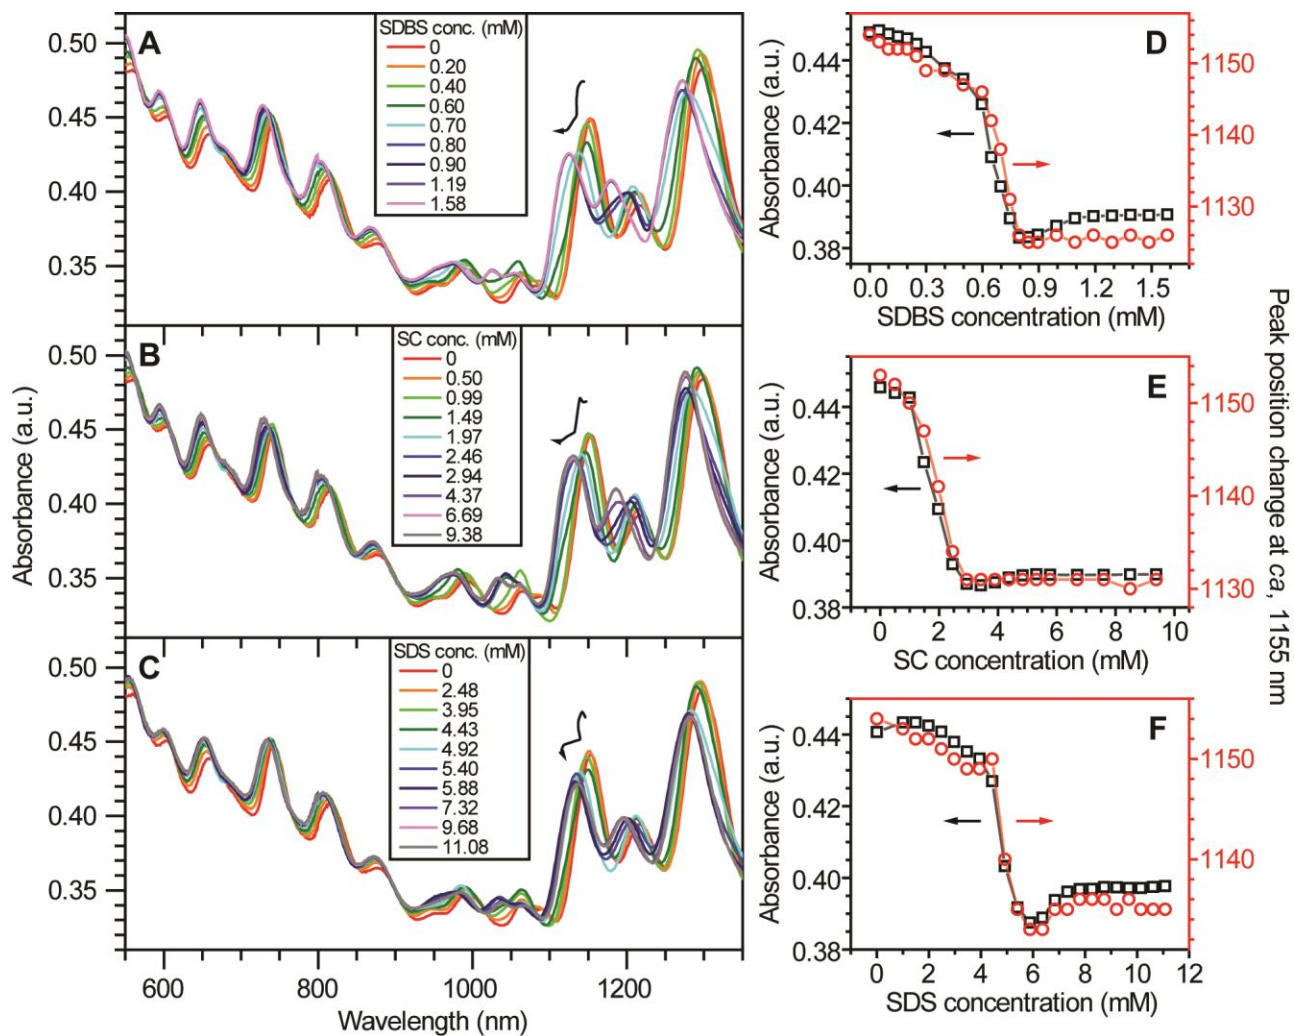

**Figure S3.** Absorption spectra of FMN-wrapped SWNTs titrated with (A) SDBS, (B) SC, and (C) SDS.

(D-F) illustrate absorption intensity change (black trace) and 1,155 nm band position change (red trace), which corresponds to a composite of (9,4), (7,6), and (8,4) nanotubes.

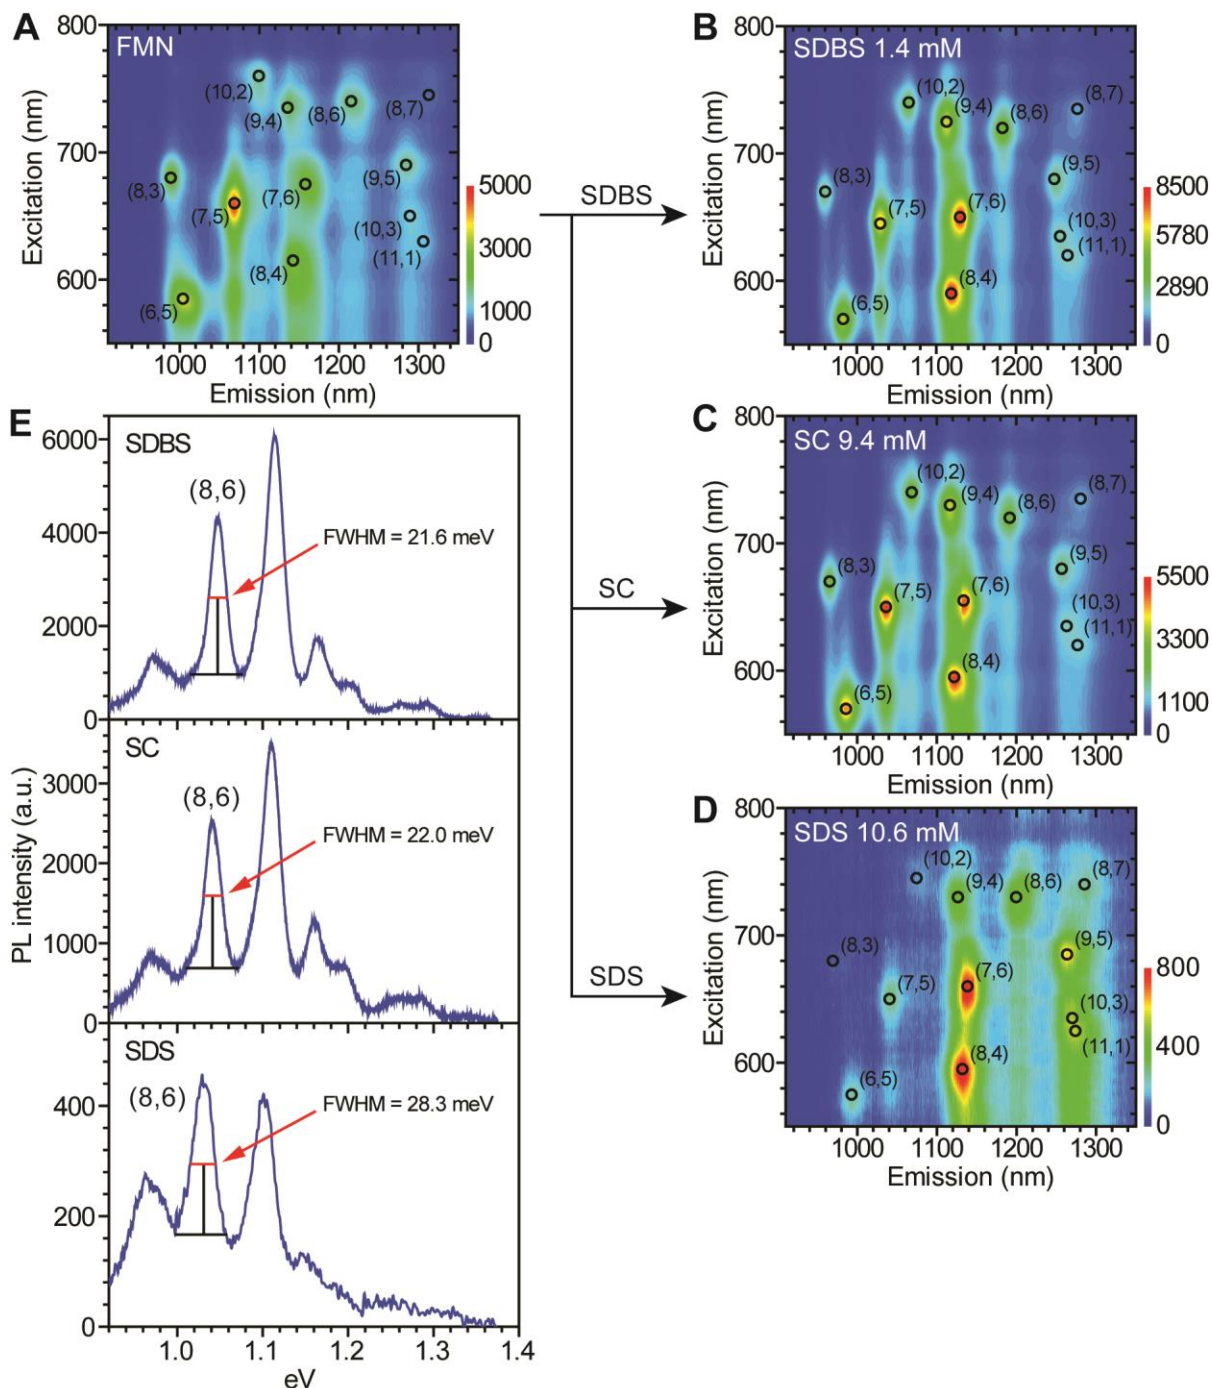

**Figure S4.** PLE maps of (A) initial FMN-wrapped SWNTs and the corresponding replaced dispersion of (B) SDBS-replaced, (C) SC-replaced, and (D) SDS-replaced nanotube dispersions. (E) FWHM of PL from (8,6) nanotubes for SDBS- (top), SC- (middle), and SDS- (bottom) replaced position.



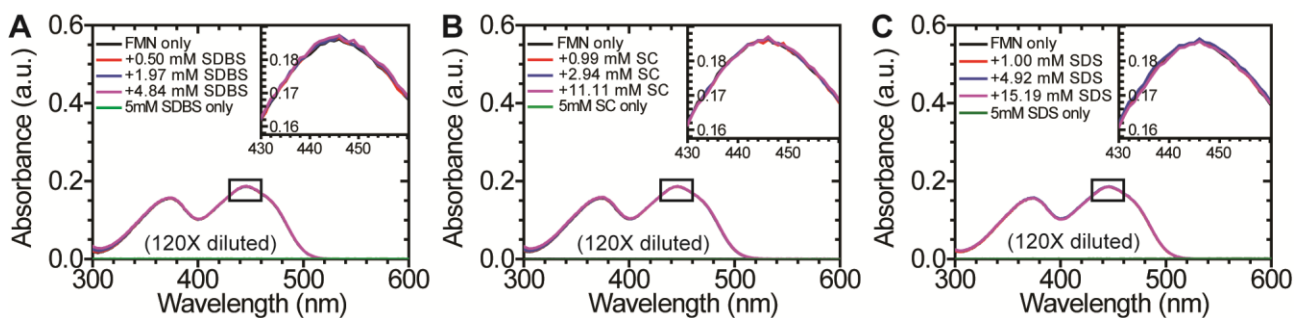

**Figure S5.** Absorption spectra of FMN titrated with (A) SDBS, (B) SC, and (C) SDS. Insets are scaled-up absorbance image from 430 nm to 460 nm. After titration of solution containing 2.09 mM FMN, the titrated solution along with the initial FMN one was diluted by 120 times.

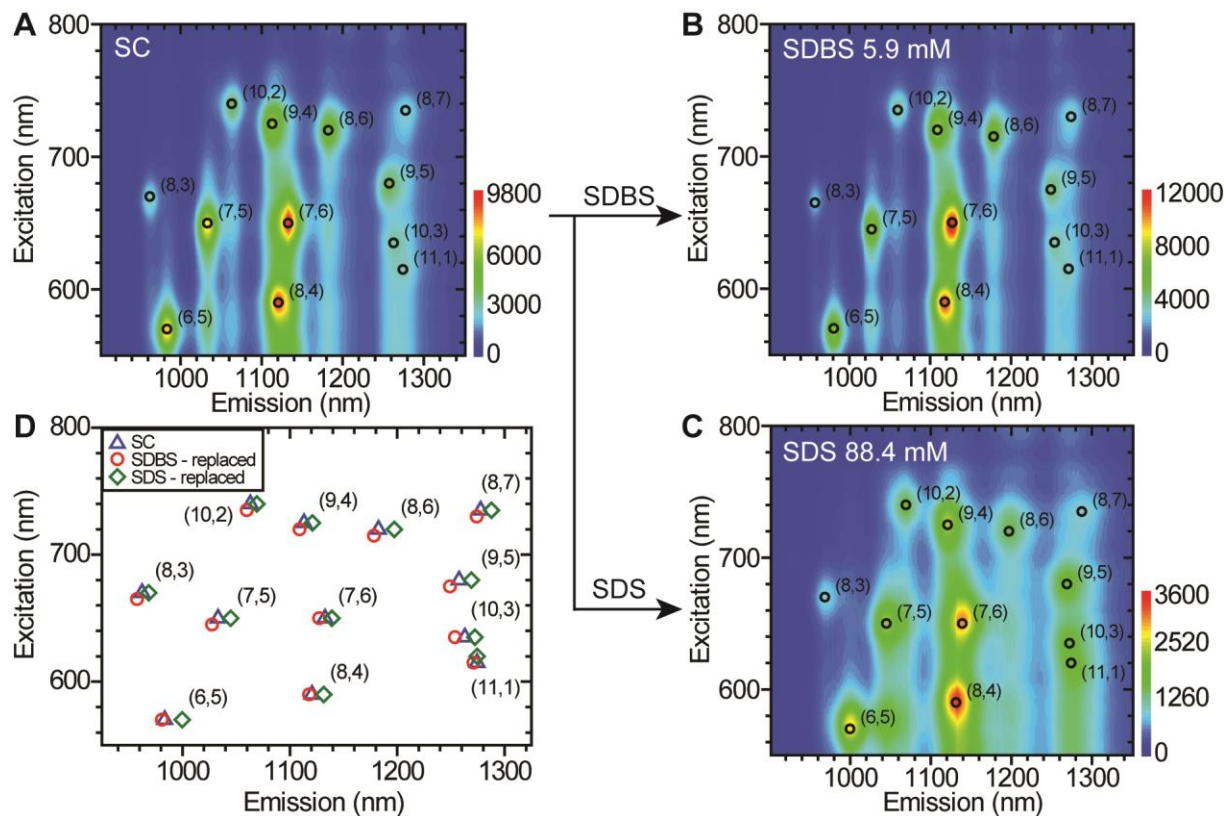

**Figure S6.** PLE maps of (A) the initial SC-wrapped SWNTs, the corresponding titrated dispersion of (B) SDBS-replaced, and (C) SDS-replaced nanotube dispersions. (D) illustrates the final PL position of various surfactant-wrapped SWNTs with respect to the SC-wrapped SWNT (indicated by a triangle).

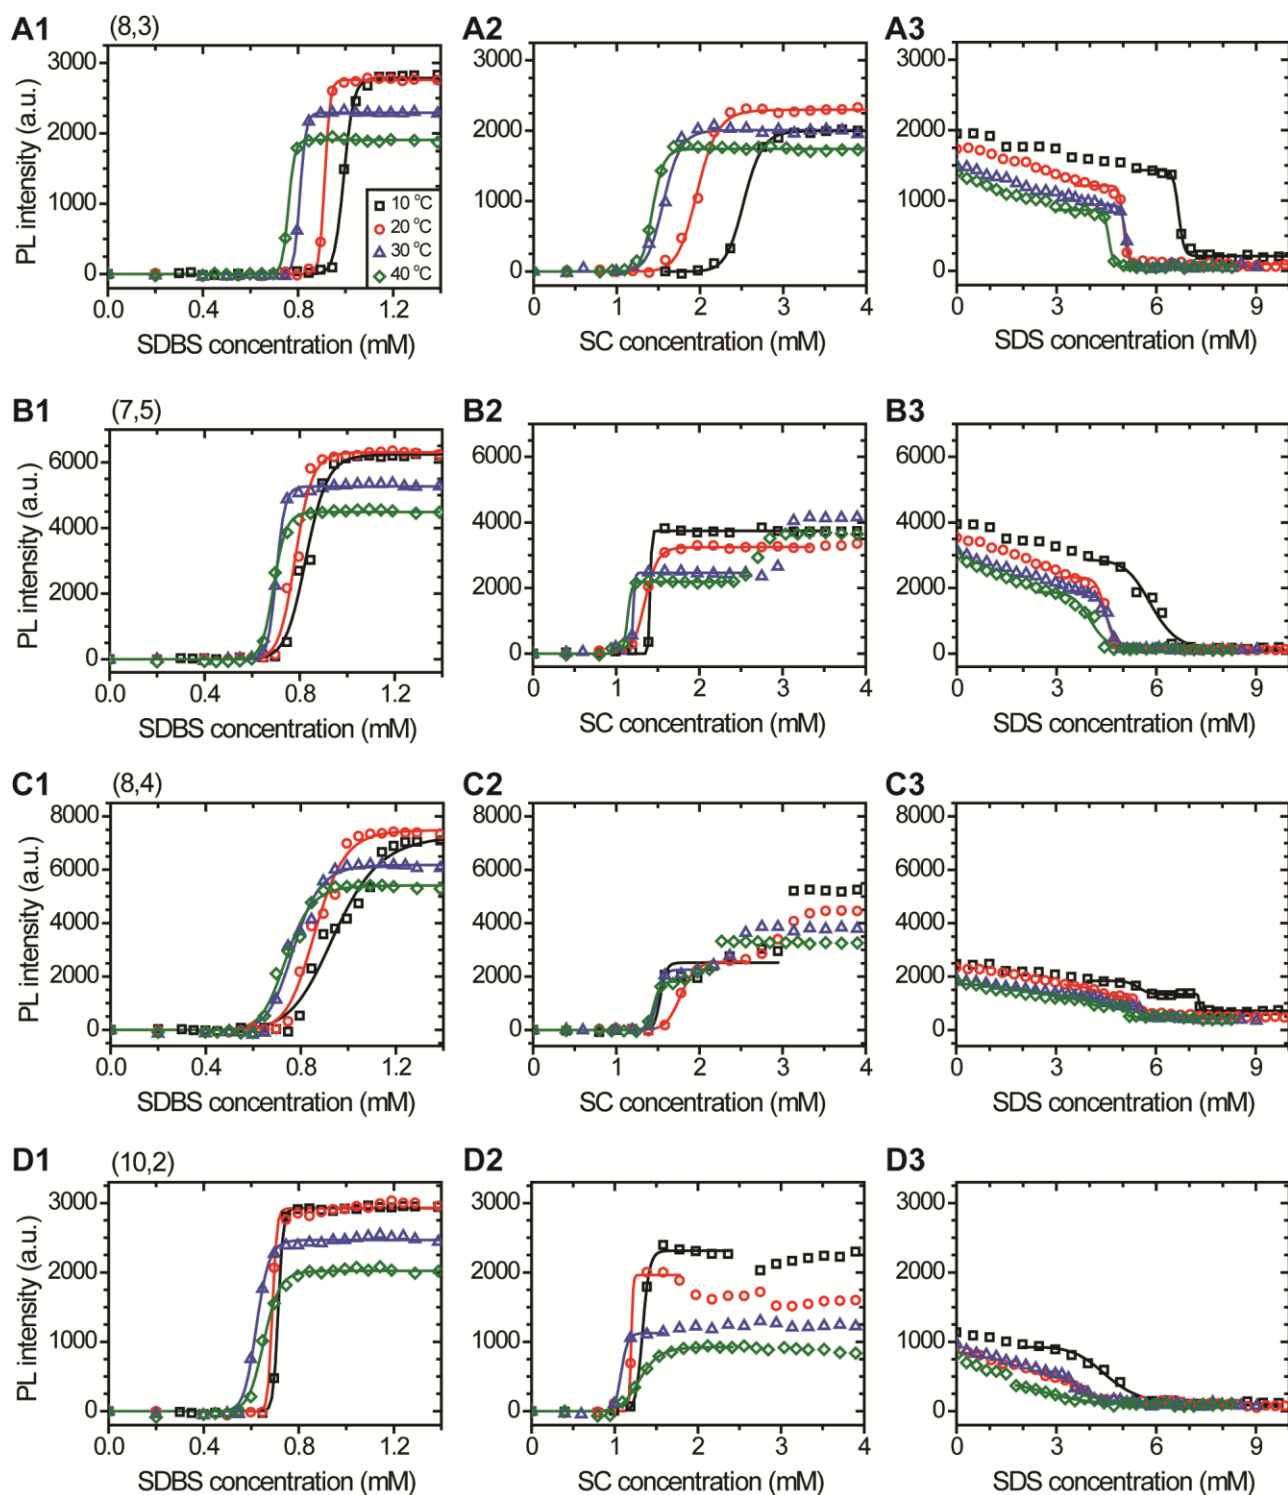

Continued to the next page

**Figure S7.** Temperature-dependent transition change of 11 other chiral nanotubes, except the (6,5) tube listed in Figure 6. (A1-K1) FMN to SDBS replacement. (A2-K2) FMN to SC replacement, and (A3-K3) FMN to SDS replacement. (10 °C: black square, 20 °C: red circle, 30 °C: blue triangle, 40 °C: green diamond).



Continued from the previous page

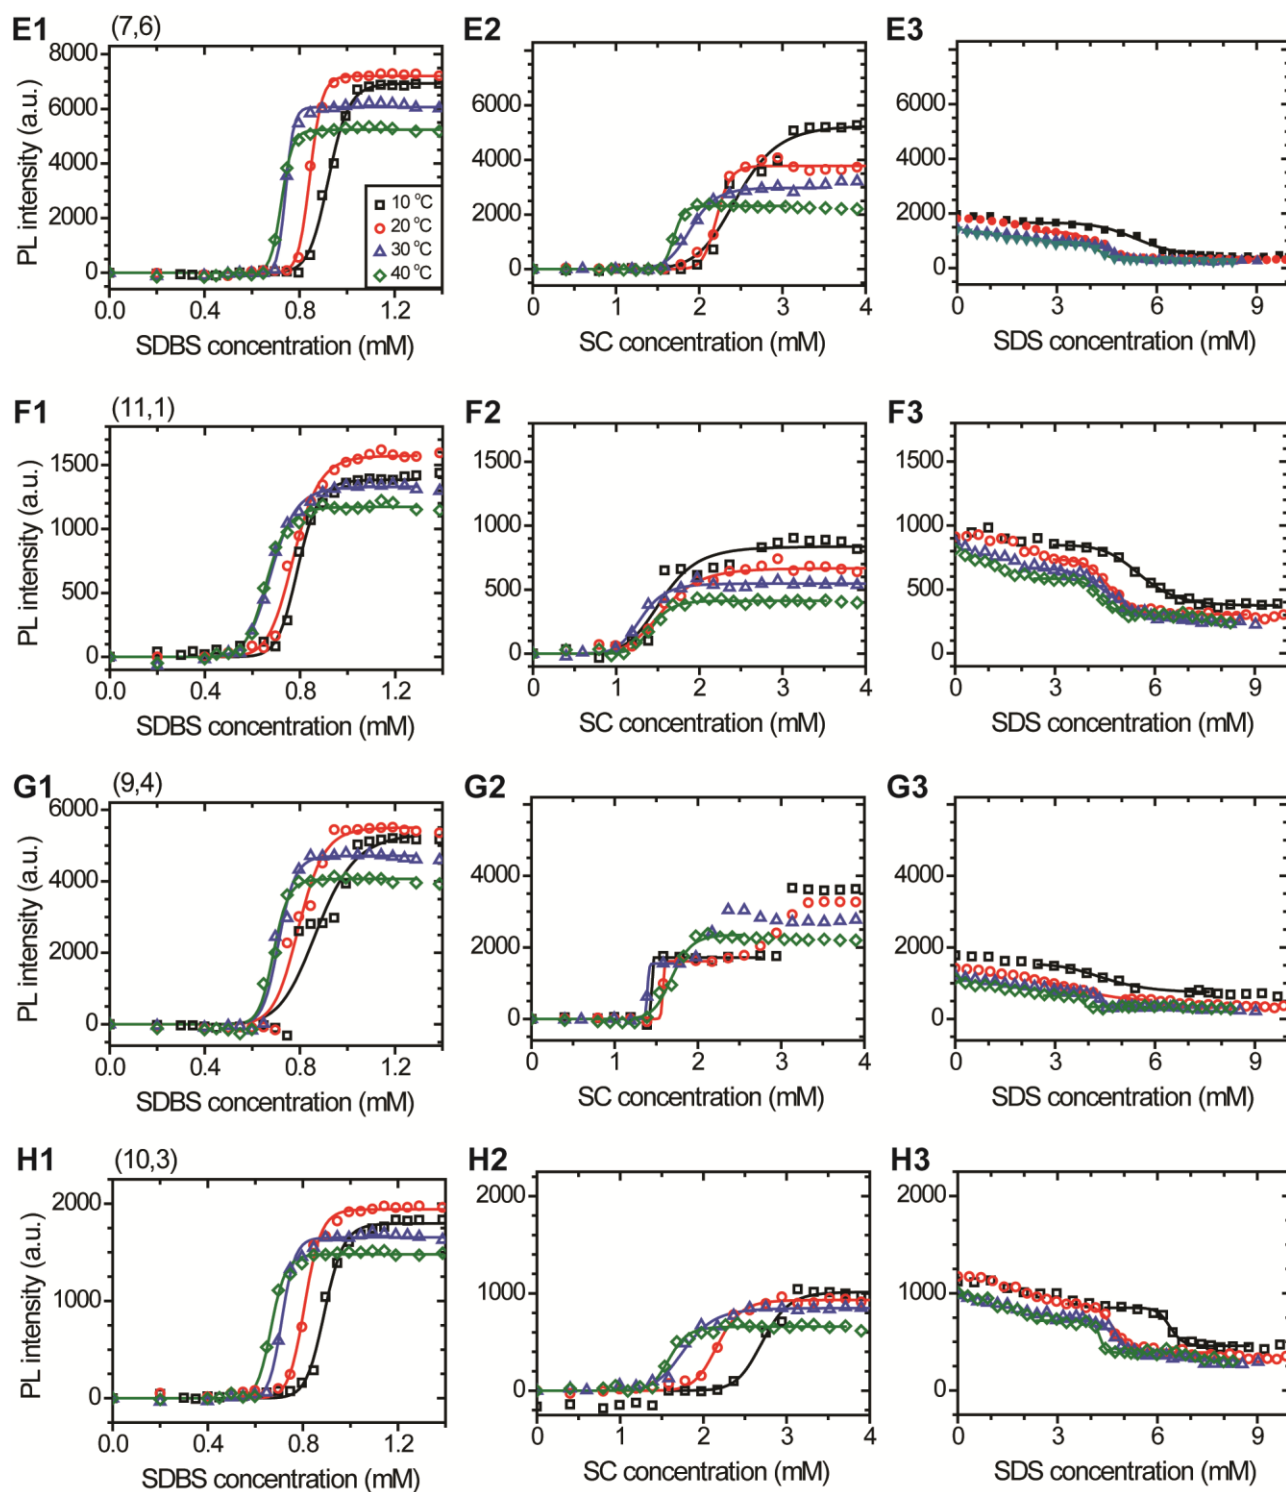

Continued from the previous page

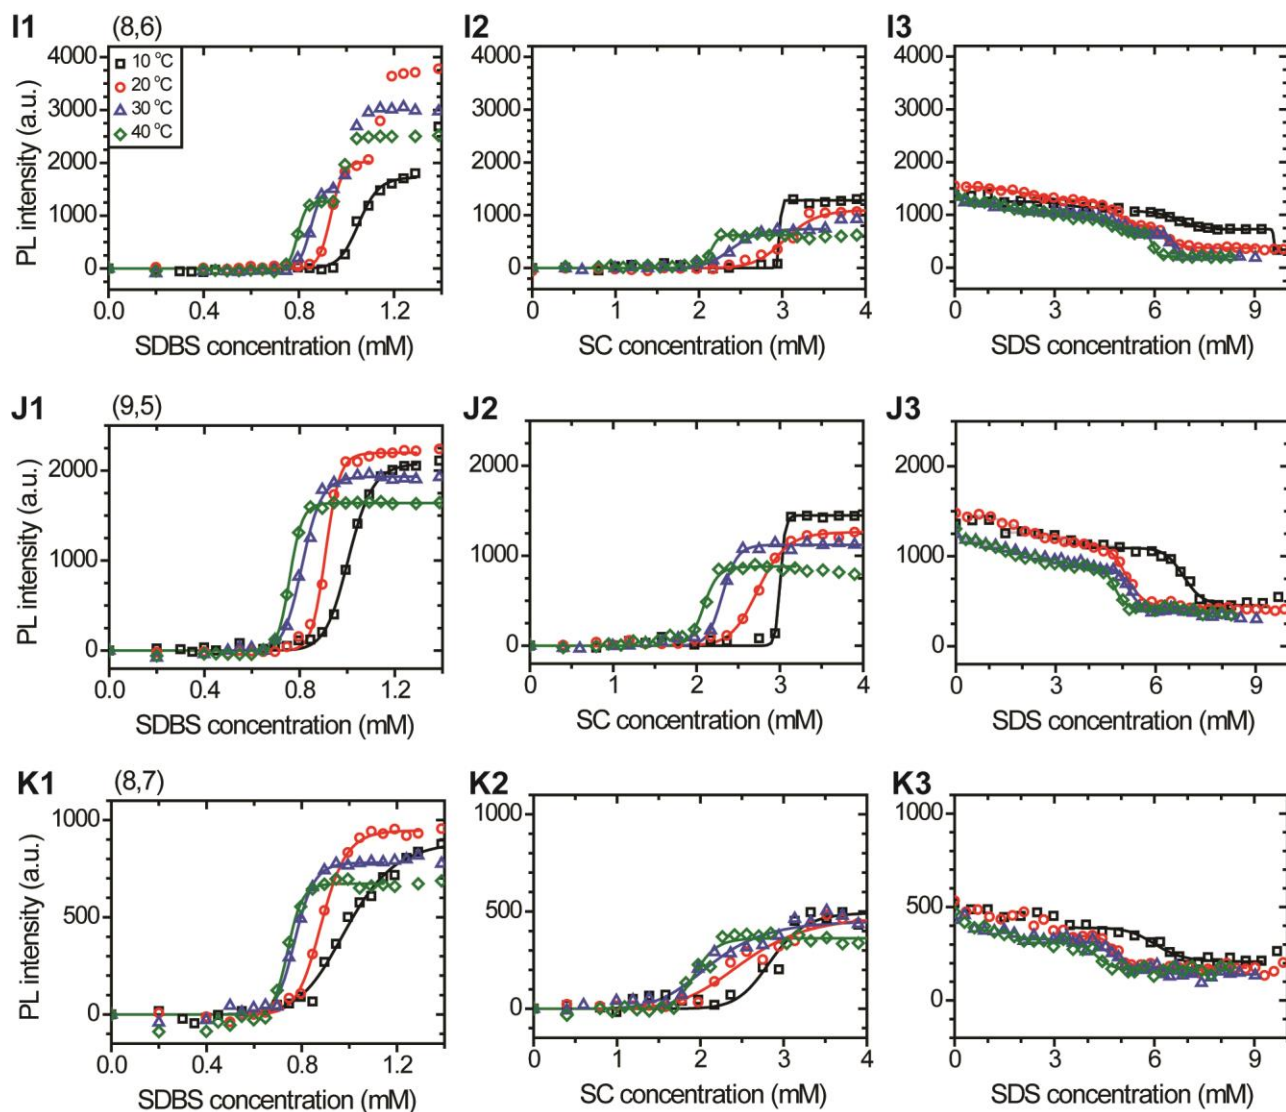

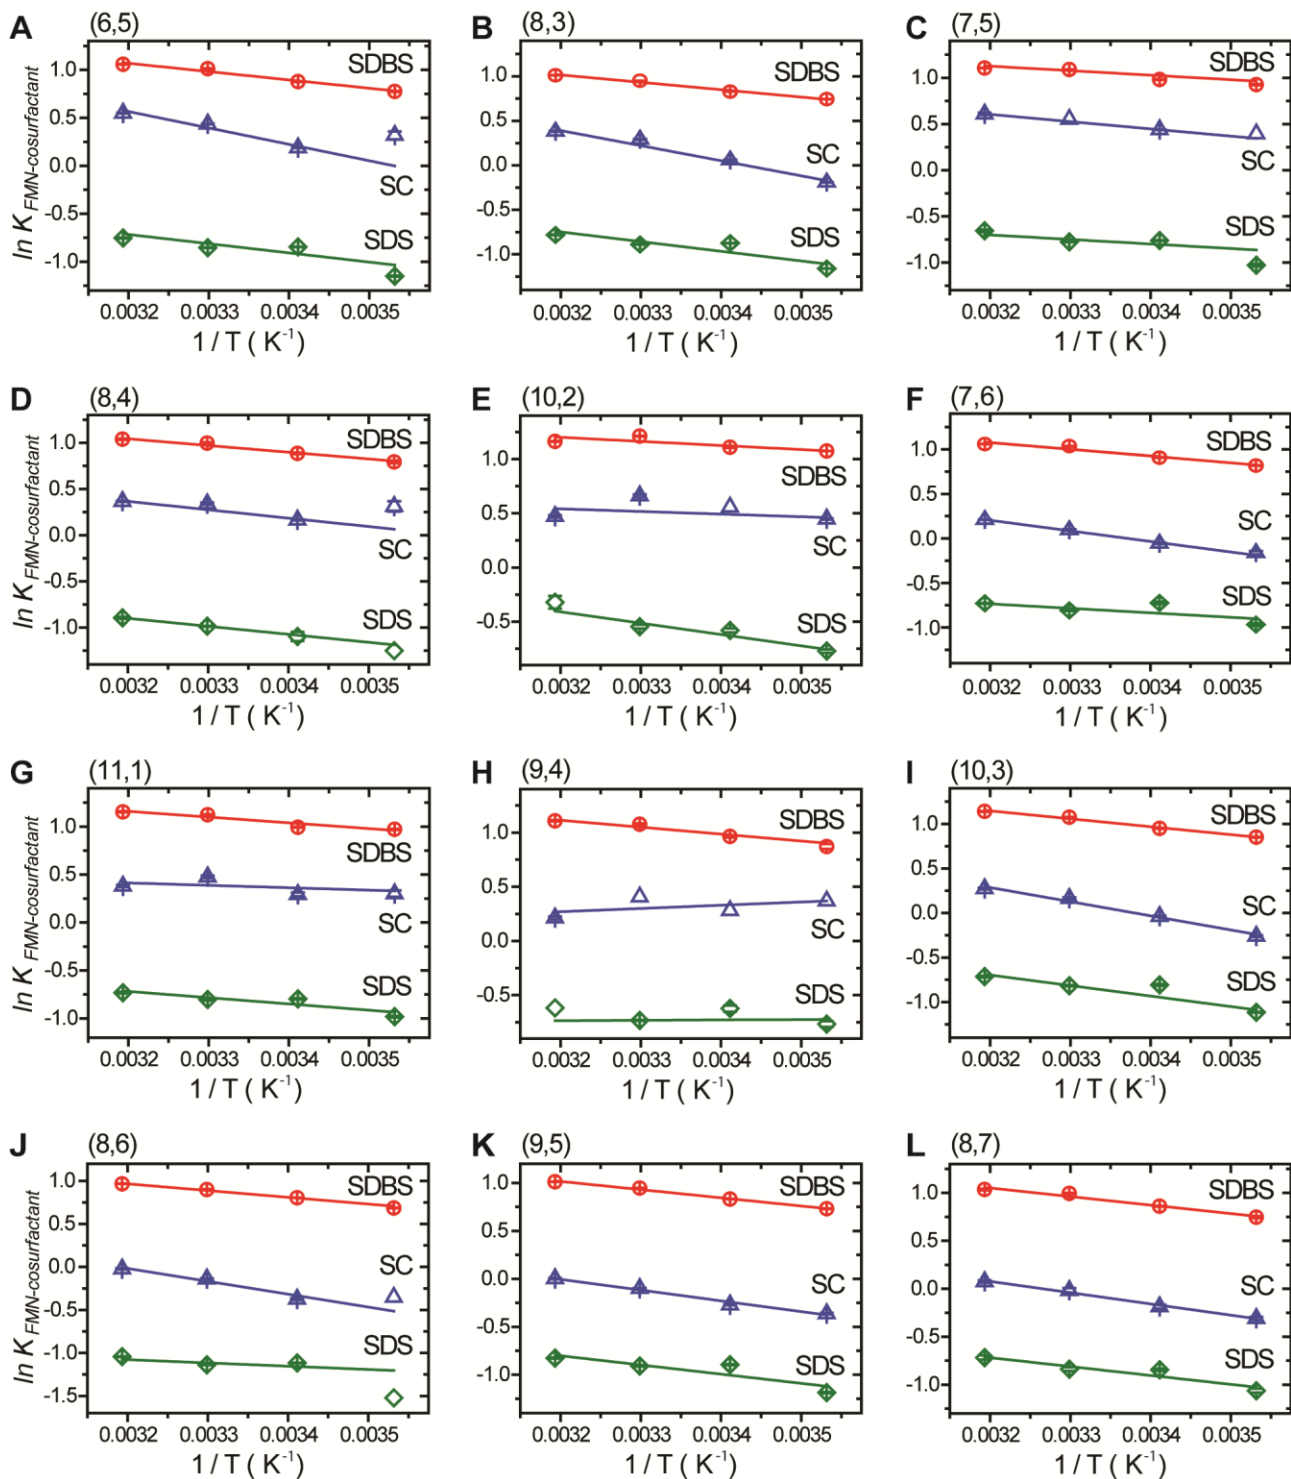

**Figure S8.** Plot between the natural logarithmic equilibrium constant  $K$  and  $1/T$  (see main text). (FMN-wrapped nanotube with SDBS: red circle, SC-replacement: blue triangle, and SDS-replacement: green diamond). The straight line is the linear regression fit of  $\ln K$  values at four different temperatures (313, 303, 293, and 283 Kelvin from left to right of x axis).

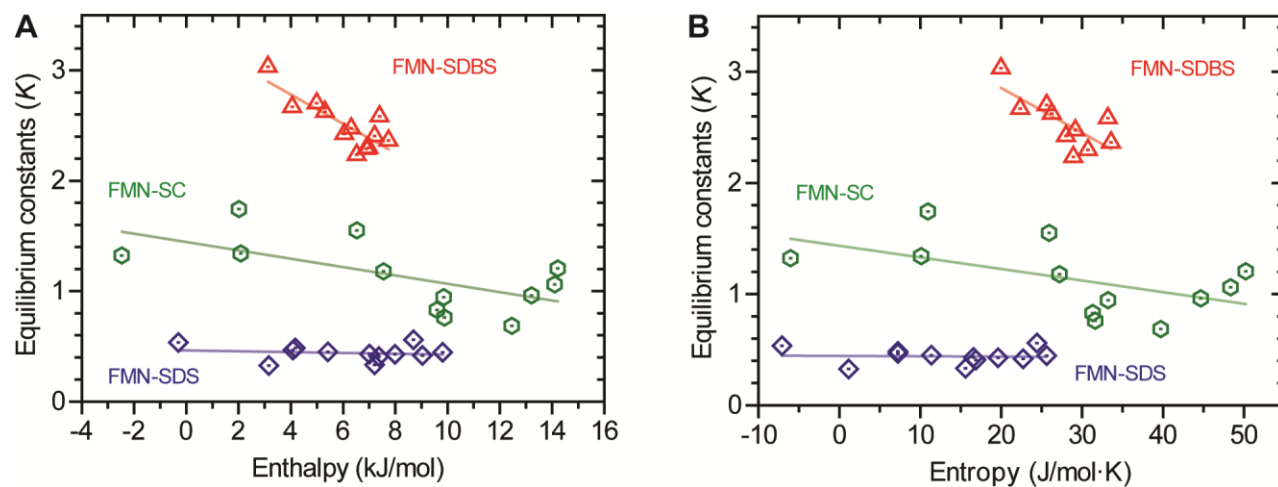

**Figure S9.** Relationship between the equilibrium constant ( $K$ ) and thermodynamic parameters of (A) enthalpy change ( $\Delta H$ ) and (B) entropy change ( $\Delta S$ ) according to the surfactant exchange system (FMN-SDBS: red triangle, FMN-SC: green hexagon, FMN-SDS: blue diamond). The symbols indicate nanotube chirality (Table S2). The linear regression fit (solid lines) was drawn to guide the trends and magnitude of each surfactant replacement.

**Table S1.** Temperature- and chirality-dependent equilibrium constant ( $K$ ) and Hill coefficient ( $\gamma$ ).**(A) FMN to SDBS replacement on SWNTs.**

| Assignment<br>( $n,m$ ) | Diameter<br>[nm] | 10 °C          |          | 20 °C          |                   | 30 °C          |          | 40 °C          |          |
|-------------------------|------------------|----------------|----------|----------------|-------------------|----------------|----------|----------------|----------|
|                         |                  | $K_{FMN-SDBS}$ | $\gamma$ | $K_{FMN-SDBS}$ | $\gamma$          | $K_{FMN-SDBS}$ | $\gamma$ | $K_{FMN-SDBS}$ | $\gamma$ |
| (6,5)                   | 0.76             | 2.17±0.01      | 19.1±1.5 | 2.41±0.01      | 24.0±2.3          | 2.75±0.01      | 26.9±2.7 | 2.88±0.01      | 32.5±3.3 |
| (8,3)                   | 0.78             | 2.11±0.00      | 48.8±3.7 | 2.29±0.00      | 81.7±3.7          | 2.59±0.00      | 64.4±3.1 | 2.75±0.00      | 58.1±2.7 |
| (7,5)                   | 0.83             | 2.53±0.01      | 18.8±1.9 | 2.67±0.01      | 22.2±2.3          | 2.98±0.00      | 39.1±2.3 | 3.02±0.01      | 27.0±1.6 |
| (8,4)                   | 0.84             | 2.21±0.03      | 9.9±1.2  | 2.42±0.02      | 13.9±1.4          | 2.71±0.03      | 13.8±1.6 | 2.83±0.02      | 13.9±1.3 |
| (10,2)                  | 0.88             | 2.93±0.00      | 69.7±3.3 | 3.03±0.02      | 76.4 <sup>§</sup> | 3.36±0.01      | 23.5±1.7 | 3.20±0.01      | 19.9±1.4 |
| (7,6)                   | 0.89             | 2.27±0.01      | 21.9±1.4 | 2.47±0.00      | 33.9±2.0          | 2.82±0.01      | 43.9±5.0 | 2.89±0.01      | 31.8±1.9 |
| (11,1)                  | 0.92             | 2.64±0.02      | 18.4±1.7 | 2.70±0.02      | 14.3±1.1          | 3.08±0.01      | 13.0±0.7 | 3.17±0.02      | 14.8±1.0 |
| (9,4)                   | 0.92             | 2.39±0.06      | 10.8±2.4 | 2.62±0.03      | 15.0±2.3          | 2.93±0.02      | 21.1±3.1 | 3.03±0.02      | 22.2±2.7 |
| (10,3)                  | 0.94             | 2.34±0.01      | 22.5±1.8 | 2.58±0.01      | 23.7±2.0          | 2.93±0.01      | 26.3±2.3 | 3.13±0.01      | 22.2±1.8 |
| (8,6)                   | 0.97             | 1.98±0.01      | 25.1±2.6 | 2.24±0.00      | 36.5±2.1          | 2.46±0.01      | 36.1±6.3 | 2.63±0.01      | 44.7±6.6 |
| (9,5)                   | 0.98             | 2.07±0.01      | 19.9±1.1 | 2.30±0.01      | 30.9±2.2          | 2.57±0.01      | 20.5±1.3 | 2.75±0.01      | 29.6±1.6 |
| (8,7)                   | 1.03             | 2.11±0.02      | 9.7±0.8  | 2.36±0.01      | 16.8±0.9          | 2.70±0.01      | 19.5±1.8 | 2.82±0.02      | 24.9±4.6 |
| Average                 |                  | 2.31           | 24.5     | 2.51           | 28.4              | 2.82           | 29.0     | 2.92           | 28.5     |

**(B) FMN to SC replacement on SWNTs.**

| Assignment<br>( $n,m$ ) | Diameter<br>[nm] | 10 °C             |                   | 20 °C             |                  | 30 °C             |                  | 40 °C        |           |
|-------------------------|------------------|-------------------|-------------------|-------------------|------------------|-------------------|------------------|--------------|-----------|
|                         |                  | $K_{FMN-SC}$      | $\gamma$          | $K_{FMN-SC}$      | $\gamma$         | $K_{FMN-SC}$      | $\gamma$         | $K_{FMN-SC}$ | $\gamma$  |
| (6,5)                   | 0.76             | 1.37±0.06         | 54.7 <sup>§</sup> | 1.21±0.00         | 12.0±0.4         | 1.55±0.01         | 14.6±0.6         | 1.73±0.01    | 16.6±1.0  |
| (8,3)                   | 0.78             | 0.83±0.00         | 22.9±1.0          | 1.06±0.00         | 16.1±1.0         | 1.34±0.01         | 15.5±1.3         | 1.46±0.00    | 21.9±1.4  |
| (7,5)                   | 0.83             | 1.48 <sup>§</sup> | 156 <sup>§</sup>  | 1.55±0.01         | 18.0±1.3         | 1.74 <sup>§</sup> | 112 <sup>§</sup> | 1.84±0.02    | 46.6±13.2 |
| (8,4)                   | 0.84             | 1.37±0.08         | 43.2 <sup>§</sup> | 1.18±0.01         | 20.0±2.0         | 1.40±0.02         | 36.4±6.6         | 1.44±0.01    | 36.5±4.0  |
| (10,2)                  | 0.88             | 1.56±0.01         | 32.6±5.6          | 1.74 <sup>§</sup> | 106 <sup>§</sup> | 1.94±0.03         | 27.6±4.1         | 1.60±0.02    | 11.2±1.2  |
| (7,6)                   | 0.89             | 0.85±0.02         | 9.9±1.5           | 0.95±0.01         | 26.8±4.2         | 1.10±0.01         | 12.7±1.1         | 1.23±0.00    | 28.9±2.7  |
| (11,1)                  | 0.92             | 1.35±0.05         | 7.1±1.6           | 1.34±0.03         | 7.0±0.9          | 1.61±0.02         | 8.9±1.0          | 1.46±0.02    | 11.9±1.4  |
| (9,4)                   | 0.92             | 1.45±0.00         | 592 <sup>§</sup>  | 1.32 <sup>§</sup> | 152 <sup>§</sup> | 1.50±1.49         | 133 <sup>§</sup> | 1.24±0.02    | 14.5±2.5  |
| (10,3)                  | 0.94             | 0.77±0.01         | 17.1±2.4          | 0.96±0.01         | 15.3±1.5         | 1.18±0.01         | 9.8±1.1          | 1.31±0.01    | 14.4±1.8  |
| (8,6)                   | 0.97             | 0.70 <sup>§</sup> | 282 <sup>§</sup>  | 0.69±0.01         | 16.1±2.7         | 0.87±0.01         | 14.8±1.3         | 0.98±0.01    | 44.7±16.2 |
| (9,5)                   | 0.98             | 0.70±0.01         | 106 <sup>§</sup>  | 0.76±0.00         | 16.3±1.1         | 0.91±0.00         | 25.9±2.7         | 1.00±0.01    | 24.7±4.0  |
| (8,7)                   | 1.03             | 0.73±0.01         | 13.8±3.0          | 0.83±0.02         | 6.4±0.8          | 0.98±0.02         | 6.3±0.9          | 1.08±0.01    | 15.2±2.8  |
| Average                 |                  | 1.10              | 17.2              | 1.05              | 15.4             | 1.31              | 17.2             | 1.37         | 23.9      |



(C) FMN to SDS replacement on SWNTs.

| Assignment<br>( <i>n,m</i> ) | Diameter<br>[nm] | 10 °C         |                   | 20 °C         |            | 30 °C         |                    | 40 °C         |                  |
|------------------------------|------------------|---------------|-------------------|---------------|------------|---------------|--------------------|---------------|------------------|
|                              |                  | $K_{FMN-SDS}$ | $\gamma$          | $K_{FMN-SDS}$ | $\gamma$   | $K_{FMN-SDS}$ | $\gamma$           | $K_{FMN-SDS}$ | $\gamma$         |
| (6,5)                        | 0.76             | 0.32±0.00     | 33.1±3.8          | 0.43±0.00     | 64.6±4.9   | 0.43±0.00     | 58.7±5.2           | 0.47±0.00     | 55.7±7.8         |
| (8,3)                        | 0.78             | 0.31±0.00     | 84.3±14.1         | 0.42±0.00     | 128.8±16.7 | 0.41±0.00     | 112±16.8           | 0.46±0.00     | 121±13.7         |
| (7,5)                        | 0.83             | 0.36±0.01     | 18.8±3.1          | 0.47±0.00     | 62.0±8.3   | 0.46±0.00     | 57.7±6.2           | 0.52±0.01     | 33.4±5.3         |
| (8,4)                        | 0.84             | 0.29±0.29     | 409 <sup>§</sup>  | 0.33±0.02     | 32.5±9.0   | 0.37±0.00     | 120 <sup>§</sup>   | 0.41±0.00     | 897 <sup>§</sup> |
| (10,2)                       | 0.88             | 0.46±0.01     | 17.5±1.9          | 0.56±0.01     | 15.4±3.4   | 0.58±0.01     | 16.8±2.7           | 0.73±0.04     | 17.8±4.5         |
| (7,6)                        | 0.89             | 0.38±0.01     | 12.3±1.1          | 0.48±0.01     | 21.0±2.5   | 0.45±0.00     | 41.8±4.8           | 0.48±0.00     | 39.7±5.6         |
| (11,1)                       | 0.92             | 0.37±0.00     | 13.0±0.8          | 0.45±0.00     | 15.8±2.5   | 0.45±0.00     | 12.1±1.1           | 0.48±0.00     | 31.2±4.1         |
| (9,4)                        | 0.92             | 0.46±0.01     | 8.5±1.1           | 0.54±0.02     | 12.5±1.5   | 0.48±0.00     | 971.5 <sup>§</sup> | 0.54±0.54     | 629 <sup>§</sup> |
| (10,3)                       | 0.94             | 0.33±0.00     | 23.7±4.2          | 0.45±0.00     | 16.2±3.2   | 0.44±0.00     | 29.9±2.8           | 0.49±0.00     | 86.9±23.1        |
| (8,6)                        | 0.97             | 0.22±0.22     | 1740 <sup>§</sup> | 0.33±0.00     | 32.2±4.1   | 0.32±0.00     | 59.2±9.7           | 0.35±0.00     | 81.5±22.4        |
| (9,5)                        | 0.98             | 0.31±0.00     | 22.1±2.5          | 0.41±0.00     | 29.0±2.9   | 0.40±0.00     | 41.3±5.0           | 0.44±0.00     | 48.3±5.9         |
| (8,7)                        | 1.03             | 0.35±0.01     | 17.1±4.2          | 0.43±0.00     | 41.9±9.2   | 0.43±0.01     | 17.9±3.8           | 0.49±0.01     | 46.6±22.7        |
| Average                      |                  | 0.35          | 25.0              | 0.44          | 39.3       | 0.44          | 44.7               | 0.49          | 56.3             |

<sup>§</sup> values here indicate the uncertainty originating from the sigmoidal transitions occurring within two intervals of titration.

**Table S2.** Thermodynamic functions (enthalpy, entropy, and Gibbs energy,) derived from van't Hoff equation.

(A) FMN to SDBS replacement on SWNTs.

| Assignment<br>( <i>n,m</i> ) | Diameter [nm] | Chiral Angle<br>[Degrees] | Enthalpy ( $\Delta H$ )<br>kJ/mol | Entropy ( $\Delta S$ )<br>J/mol · K | Gibbs Energy<br>( $\Delta G$ ) kJ/mol<br>at 25 °C |
|------------------------------|---------------|---------------------------|-----------------------------------|-------------------------------------|---------------------------------------------------|
| (6,5)                        | 0.76          | 27                        | 7.21±0.85                         | 32.0±2.83                           | -2.32±1.69                                        |
| (8,3)                        | 0.78          | 15.3                      | 6.89±0.64                         | 30.5±2.13                           | -2.20±1.27                                        |
| (7,5)                        | 0.83          | 24.5                      | 4.06±1.57                         | 22.3±5.18                           | -2.61±3.12                                        |
| (8,4)                        | 0.84          | 19.1                      | 6.04±0.71                         | 28.0±2.35                           | -2.31±1.41                                        |
| (10,2)                       | 0.88          | 8.9                       | 3.12±1.01                         | 20.0±3.53                           | -2.83±2.07                                        |
| (7,6)                        | 0.89          | 27.5                      | 6.32±1.19                         | 29.2±3.98                           | -2.38±2.38                                        |
| (11,1)                       | 0.92          | 4.3                       | 4.99±1.09                         | 25.6±3.64                           | -2.64±2.17                                        |
| (9,4)                        | 0.92          | 17.5                      | 5.31±1.12                         | 26.3±3.67                           | -2.52±2.22                                        |
| (10,3)                       | 0.94          | 12.7                      | 7.39±0.55                         | 33.2±1.84                           | -2.50±1.10                                        |
| (8,6)                        | 0.97          | 25.3                      | 6.52±0.42                         | 28.9±1.41                           | -2.10±0.84                                        |
| (9,5)                        | 0.98          | 20.6                      | 6.98±0.33                         | 30.7±1.10                           | -2.19±0.66                                        |
| (8,7)                        | 1.03          | 27.8                      | 7.74±1.14                         | 33.6±3.86                           | -2.28±2.29                                        |
| Average                      |               |                           | 6.05                              | 28.4                                | -2.41                                             |

(B) FMN to SC replacement on SWNTs.

| Assignment<br>( <i>n,m</i> ) | Diameter [nm] | Chiral Angle<br>[Degrees] | Enthalpy ( $\Delta H$ )<br>kJ/mol | Entropy ( $\Delta S$ )<br>J/mol · K | Gibbs Energy<br>( $\Delta G$ ) kJ/mol<br>at 25 °C |
|------------------------------|---------------|---------------------------|-----------------------------------|-------------------------------------|---------------------------------------------------|
| (6,5)                        | 0.76          | 27                        | 14.2±2.20                         | 50.2±7.33                           | -0.75±4.39                                        |
| (8,3)                        | 0.78          | 15.3                      | 14.1±1.25                         | 48.4±4.20                           | -0.32±2.50                                        |
| (7,5)                        | 0.83          | 24.5                      | 6.53±0.03                         | 25.9±0.09                           | -1.20±0.05                                        |
| (8,4)                        | 0.84          | 19.1                      | 7.55±1.44                         | 27.2±4.75                           | -0.56±2.85                                        |
| (10,2)                       | 0.88          | 8.9                       | 2.01±2.74                         | 10.9±9.36                           | -1.25±5.53                                        |
| (7,6)                        | 0.89          | 27.5                      | 9.85±0.39                         | 33.2±1.28                           | -0.05±0.77                                        |
| (11,1)                       | 0.92          | 4.3                       | 2.09±3.68                         | 10.1±12.1                           | -0.93±7.28                                        |
| (9,4)                        | 0.92          | 17.5                      | -2.47±3.07                        | -6.03±10.3                          | -0.67±6.14                                        |
| (10,3)                       | 0.94          | 12.7                      | 13.2±1.03                         | 44.7±3.49                           | -0.10±2.08                                        |
| (8,6)                        | 0.97          | 25.3                      | 12.5±2.04                         | 39.7±6.69                           | 0.61±4.04                                         |
| (9,5)                        | 0.98          | 20.6                      | 9.88±1.18                         | 31.6±3.95                           | 0.45±2.35                                         |
| (8,7)                        | 1.03          | 27.8                      | 9.60±0.49                         | 31.3±1.64                           | 0.26±0.98                                         |
| Average                      |               |                           | 8.25                              | 28.9                                | -0.38                                             |

(C) FMN to SDS replacement on SWNTs.

| Assignment<br>( <i>n,m</i> ) | Diameter [nm] | Chiral Angle<br>[Degrees] | Enthalpy ( $\Delta H$ )<br>kJ/mol | Entropy ( $\Delta S$ )<br>J/mol·K | Gibbs Energy<br>( $\Delta G$ ) kJ/mol<br>at 25 °C |
|------------------------------|---------------|---------------------------|-----------------------------------|-----------------------------------|---------------------------------------------------|
| (6,5)                        | 0.76          | 27                        | 7.99±4.48                         | 19.6±15.1                         | 2.14±8.99                                         |
| (8,3)                        | 0.78          | 15.3                      | 9.04±3.44                         | 22.7±11.7                         | 2.27±6.92                                         |
| (7,5)                        | 0.83          | 24.5                      | 4.08±3.87                         | 7.23±13.0                         | 1.92±7.75                                         |
| (8,4)                        | 0.84          | 19.1                      | 7.21±0.21                         | 15.6±0.68                         | 2.56±0.41                                         |
| (10,2)                       | 0.88          | 8.9                       | 8.70±2.06                         | 24.4±7.03                         | 1.41±4.15                                         |
| (7,6)                        | 0.89          | 27.5                      | 4.17±2.38                         | 7.24±7.76                         | 2.01±4.70                                         |
| (11,1)                       | 0.92          | 4.3                       | 5.42±1.99                         | 11.4±6.70                         | 2.03±3.99                                         |
| (9,4)                        | 0.92          | 17.5                      | -0.30±2.49                        | -7.08±8.22                        | 1.81±4.94                                         |
| (10,3)                       | 0.94          | 12.7                      | 9.81±2.29                         | 25.6±7.75                         | 2.18±4.60                                         |
| (8,6)                        | 0.97          | 25.3                      | 3.16±2.54                         | 1.15±8.36                         | 2.82±5.03                                         |
| (9,5)                        | 0.98          | 20.6                      | 7.37±3.11                         | 16.9±10.4                         | 2.34±6.21                                         |
| (8,7)                        | 1.03          | 27.8                      | 7.01±2.82                         | 16.6±9.54                         | 2.07±5.66                                         |
| Average                      |               |                           | 6.14                              | 13.4                              | 2.13                                              |

***Cited References***

- (1) Stryer, L., Biochemistry; 4th Ed.; W.H. Freeman & Company: New York, 1995.
- (2) Ju, S.-Y.; Doll, J.; Sharma, I.; Papadimitrakopoulos, F., Selection of Carbon Nanotubes with Specific Chiralities using Helical Assemblies of Flavin Mononucleotide. *Nat. Nanotechnol.* **2008**, *3*, 356-362.
- (3) Kato, Y.; Niidome, Y.; Nakshima, N., Thermodynamics of the Exchange of Solubilizers on Single-walled Carbon Nanotubes. *Chem. Lett.* **2011**, *40*, 730-732.
